# Supplementary material for: Genetic inhibition of hepatic acetyl-CoA carboxylase activity increases liver fat and alters global protein acetylation
Source: PubMed Central journal article supplement — Mol Metab. 2014 Mar 12;3(4):419–31. doi: 10.1016/j.molmet.2014.02.004 (PMC4060285; doi:10.1016/j.molmet.2014.02.004), 2014-03-12
Supplement: mmc3.pdf [file mmc3.pdf]

## Supplemental Data

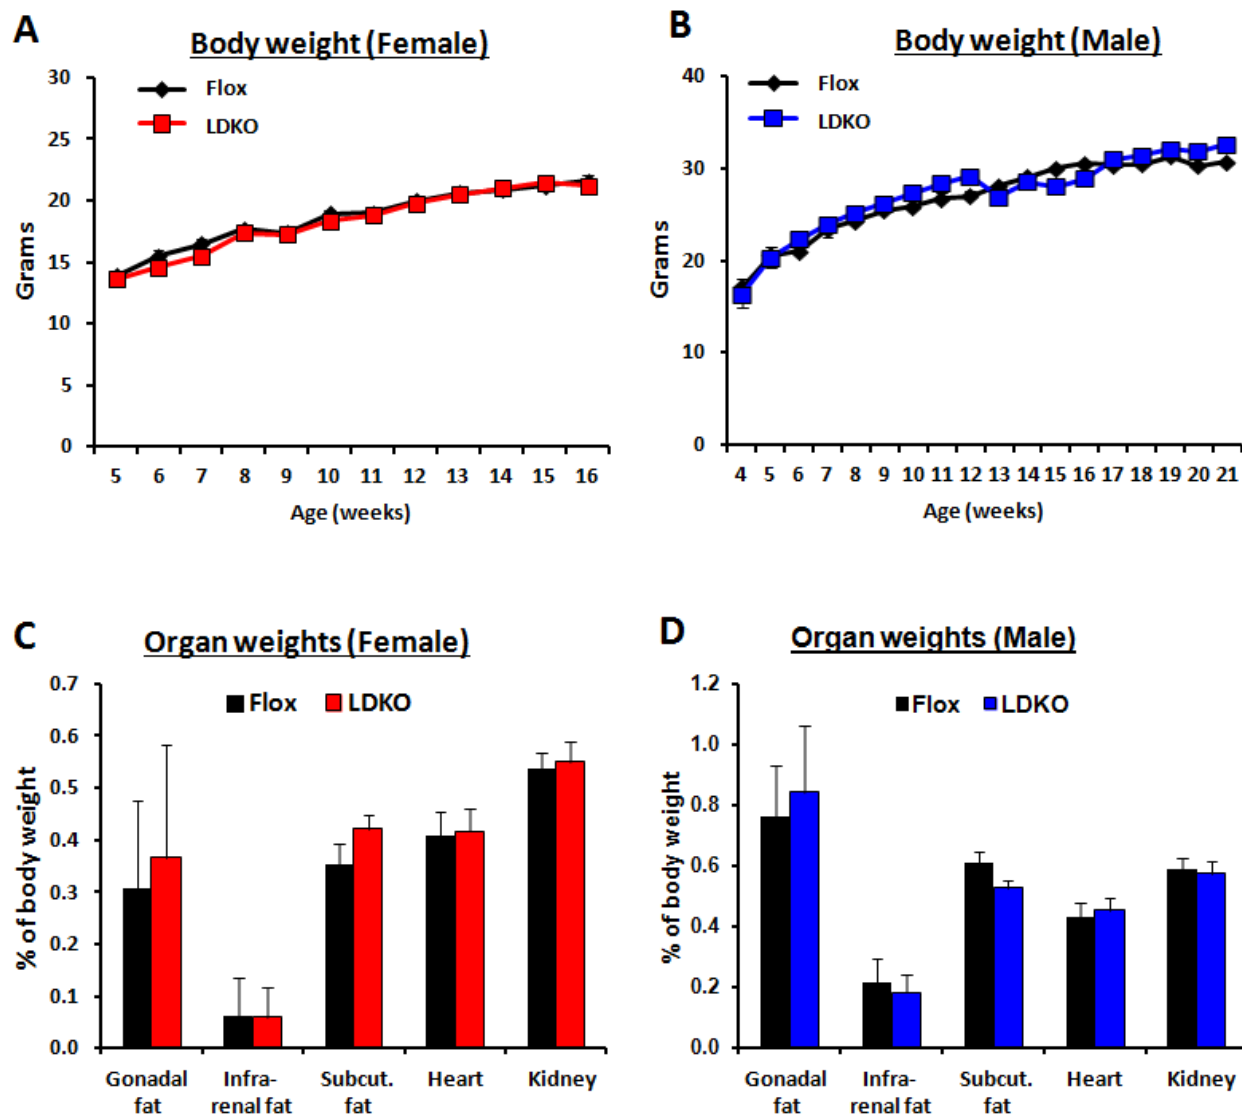

**Figure S1. Body weight and organ mass.** (A and C) Female body weight ( $n > 6$ ) and organ weights ( $n = 5$  flox,  $n = 8$  LDKO), and (B and D) male body weight ( $n > 6$ ) and organ weights ( $n = 5$  flox,  $n = 9$  LDKO). Data expressed as mean  $\pm$  SEM.

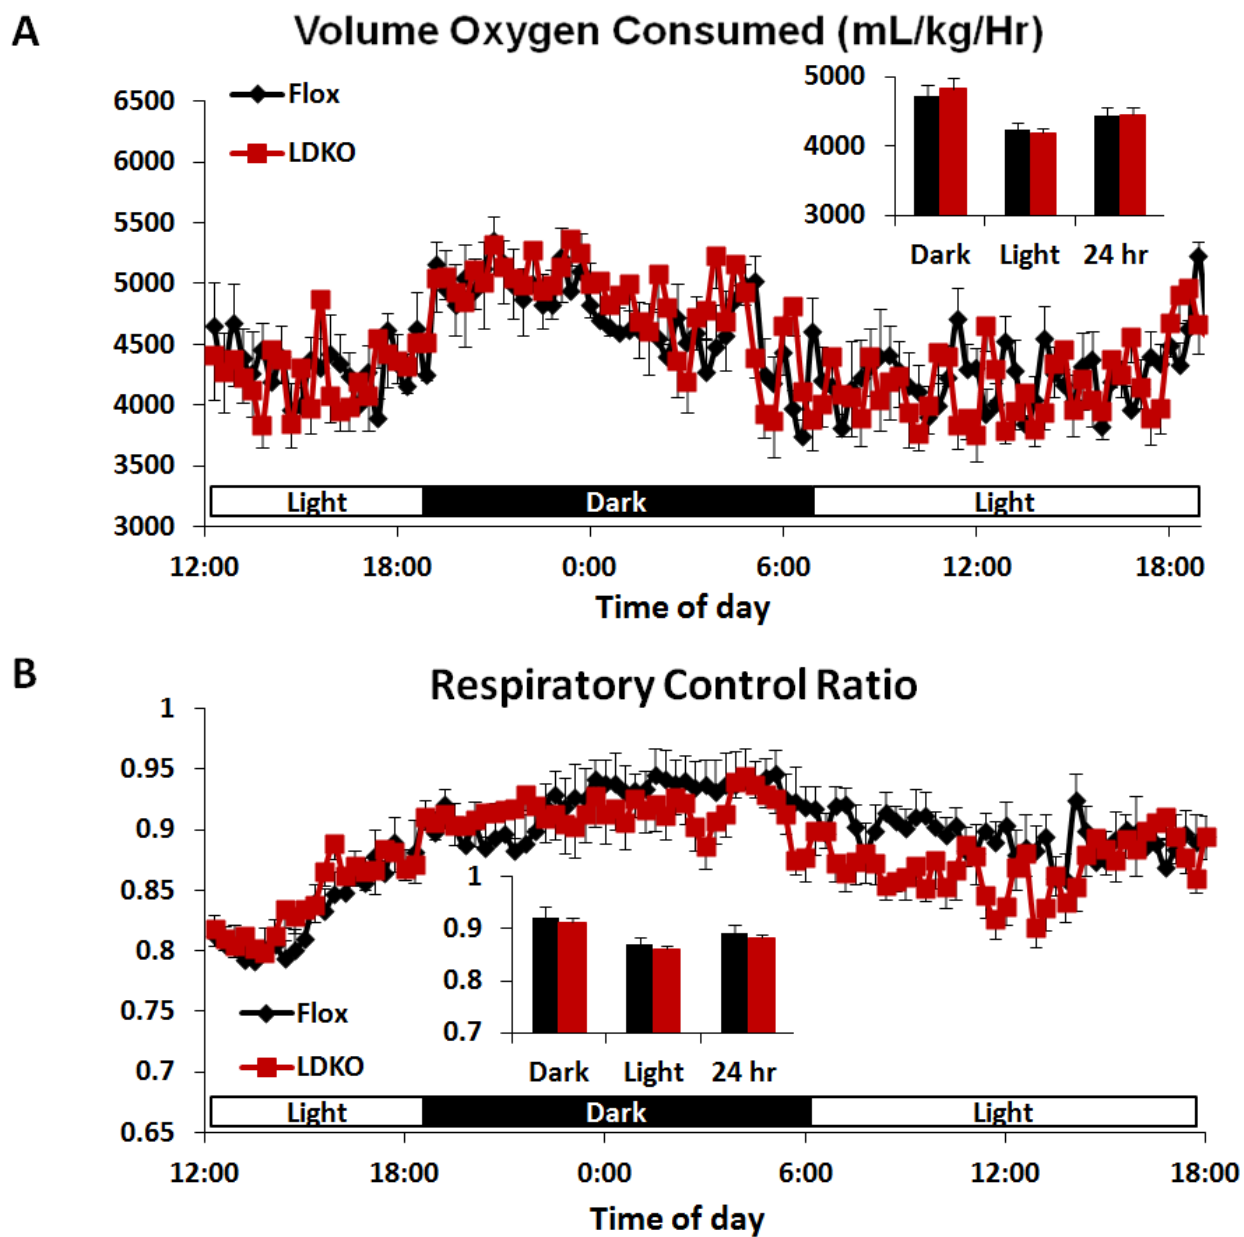

**Figure S2. Diurnal respirometry.** Indirect calorimetry was used to determine **(A)**  $VO_2$  and **(B)** RER in 22 week-old female flox and LDKO mice at the fed state. Data expressed as mean  $\pm$  SEM (n=8).

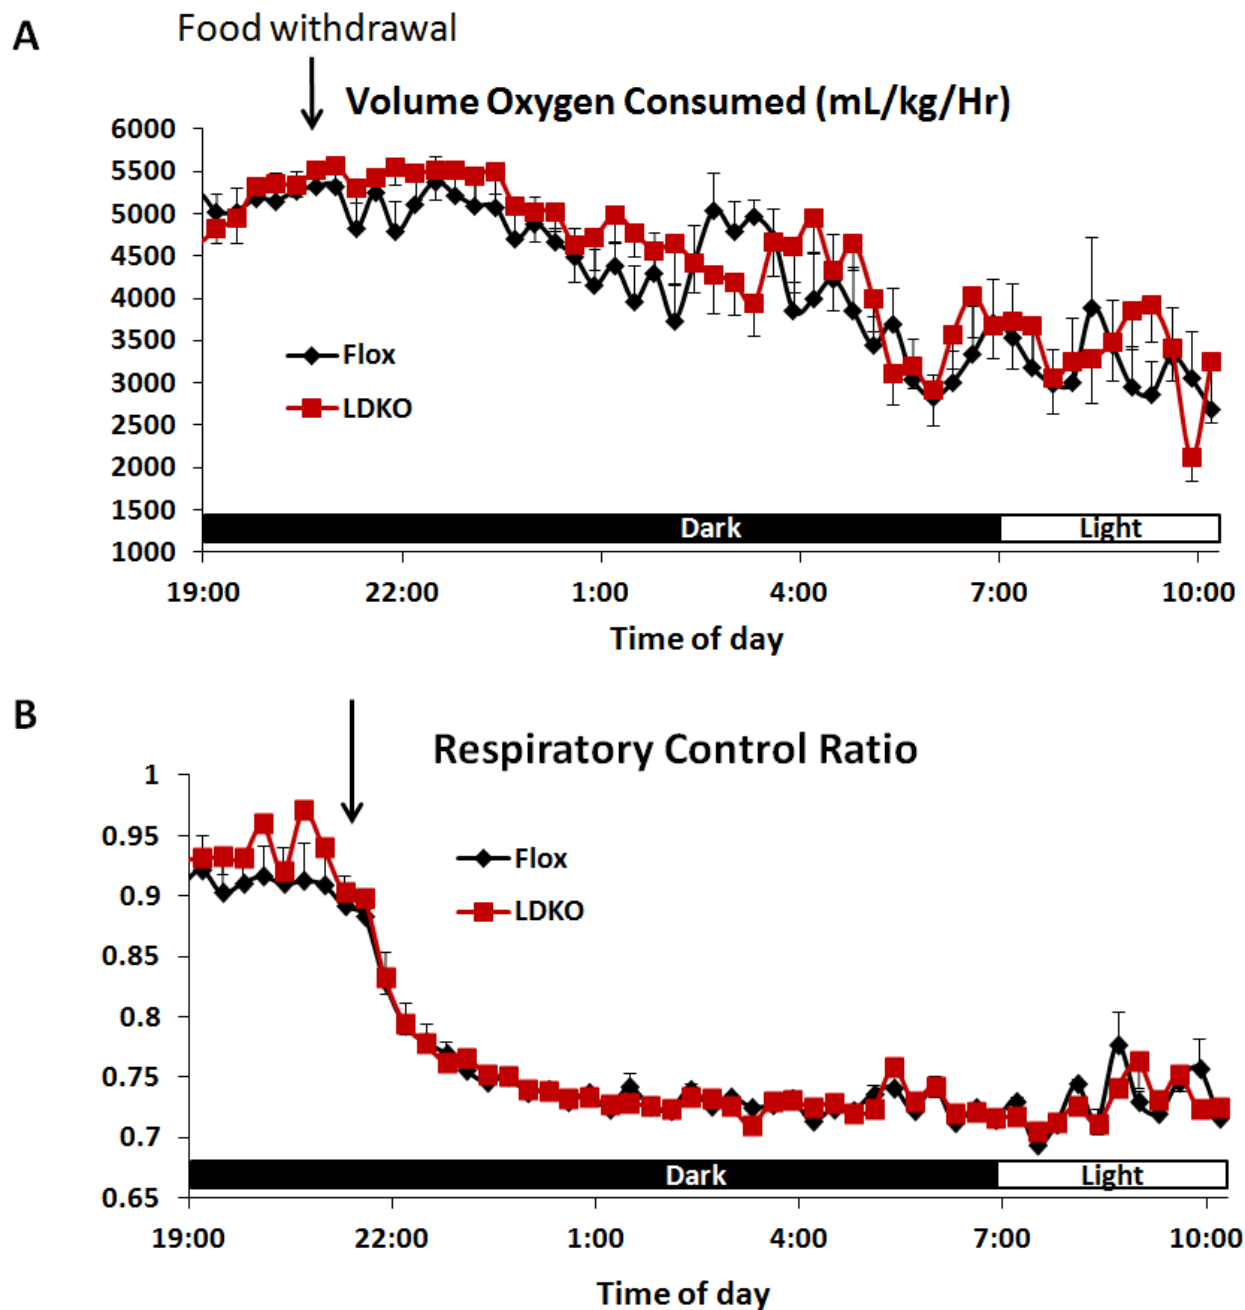

**Figure S3. Respirometry changes in response to fasting.** Indirect calorimetry measurements were used to determine **(A)**  $VO_2$  and **(B)** RER in 22 week-old female flox and LDKO mice at the fasted state. Data expressed as mean  $\pm$  SEM (n=4).

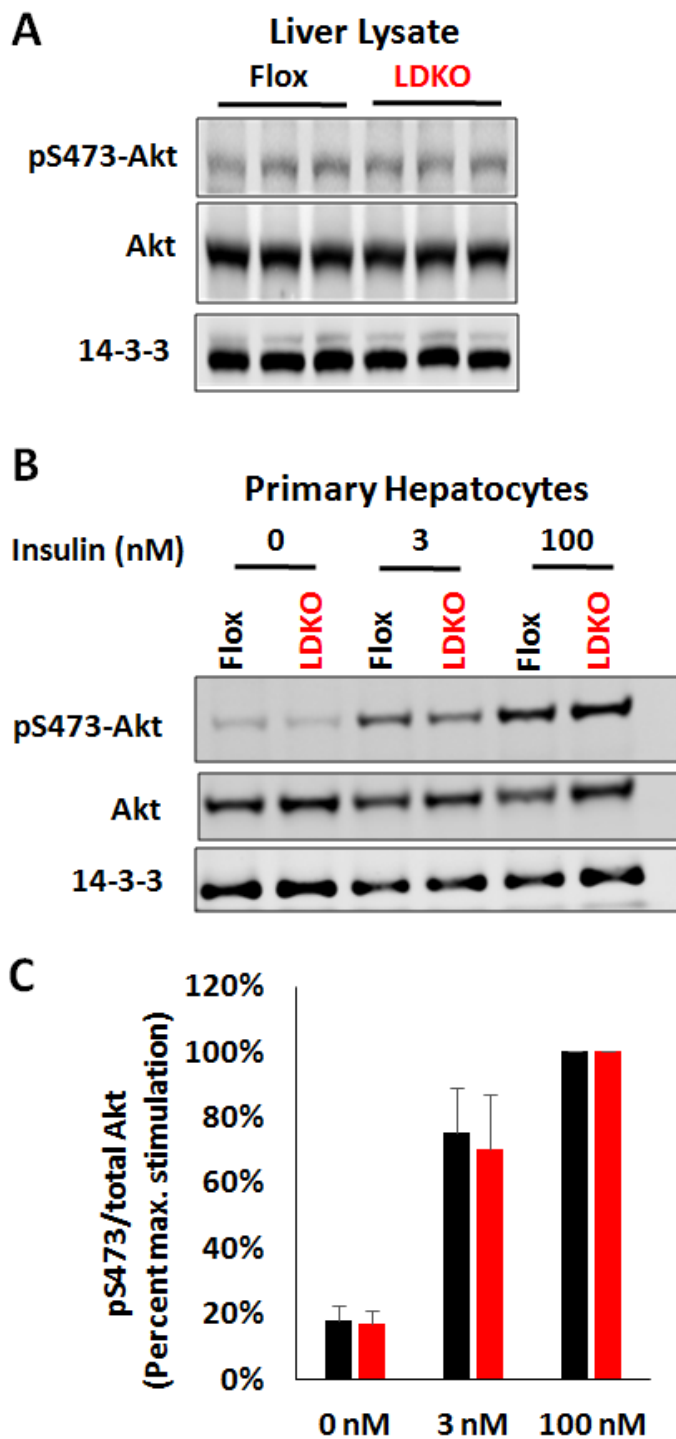

**Figure S4. Insulin signaling through Akt.** (A) Western blot analysis of Akt phosphorylation in liver tissue from LDKO and flox mice (n=3 mice). (B) Representative Western blot of whole cell lysates from primary hepatocytes stimulated with 3 or 100 nM insulin for 10 min. (C) Quantification of phospho-Akt/total Akt from (B) (n=4-5). Data expressed as mean  $\pm$  SEM.

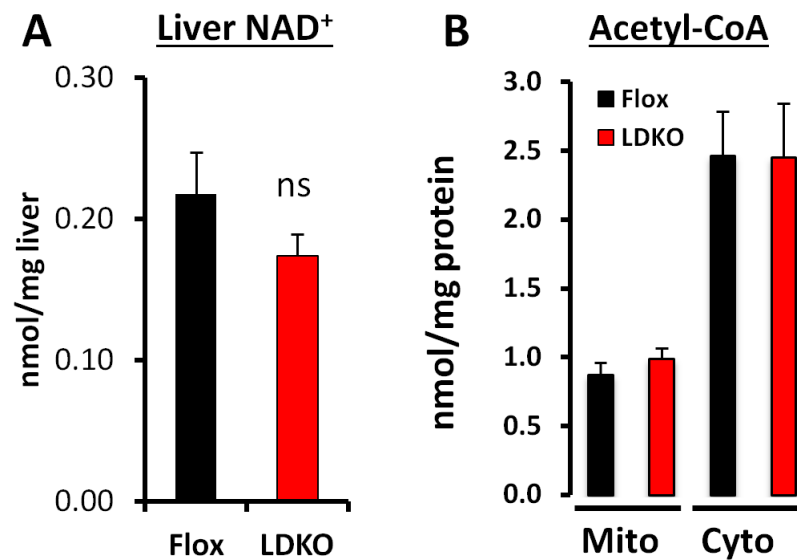

**Figure S5.** (A) NAD<sup>+</sup> level in liver lysates. (B) Acetyl-CoA levels in mitochondrial and cytoplasmic fractions of mouse liver (n=4). Data expressed as mean  $\pm$  SEM. ns, non-significant.
